# Supplementary material
Source: PubMed Central journal article supplement (PMC7007548)
Supplement: pnas.1915047117.sapp.pdf [file pnas.1915047117.sapp.pdf]

# PNAS

www.pnas.org

Supplementary Information for

## **Intestinal microbes influence development of thymic lymphocytes in early life**

Maria Ennamorati<sup>1,¶</sup>, Chithirachelvi Vasudevan<sup>1,¶</sup>, Kara Clerkin<sup>1,¶</sup>, Stefan Halvorsen<sup>2</sup>,  
Smriti Verma<sup>1</sup>, Samira Ibrahim<sup>1</sup>, Shaniah Prosper<sup>1</sup>, Caryn Porter<sup>2</sup>, Vladimir Yelisseyev<sup>3</sup>,  
Margot Kim<sup>4</sup>, Joseph Gardecki<sup>4</sup>, Slim Sassi<sup>2,5</sup>, Guillermo Tearney<sup>4</sup>, Bobby J. Cherayil<sup>1,6</sup>,  
Lynn Bry<sup>3</sup>, Brian Seed<sup>2</sup>, Nitya Jain<sup>1,2,6,\*</sup>

<sup>1</sup>Mucosal Immunology and Biology Research Center, Massachusetts General Hospital *for* Children, 114 16<sup>th</sup> Street, Charlestown, MA 02129, USA

<sup>2</sup>Center for Computational and Integrative Biology, Massachusetts General Hospital, 185 Cambridge Street, Boston MA 02114, USA

<sup>3</sup>Massachusetts Host-Microbiome Center, Brigham & Women's Hospital, Harvard Medical School, 75 Francis St., Boston, MA 02115, USA

<sup>4</sup>Wellman Center for Photomedicine, Massachusetts General Hospital, 50 Blossom Street, Boston, MA 02114

<sup>5</sup>Orthopedics Department, Harvard Medical School, Boston, MA 02115, USA

<sup>6</sup>Department of Pediatrics, Harvard Medical School, Boston, MA 02115, USA

Correspondence to Nitya Jain

Email: [njain@ccib.mgh.harvard.edu](mailto:njain@ccib.mgh.harvard.edu)

### **This PDF file includes:**

Supplementary text  
Figures S1 to S14

## A THYMUS

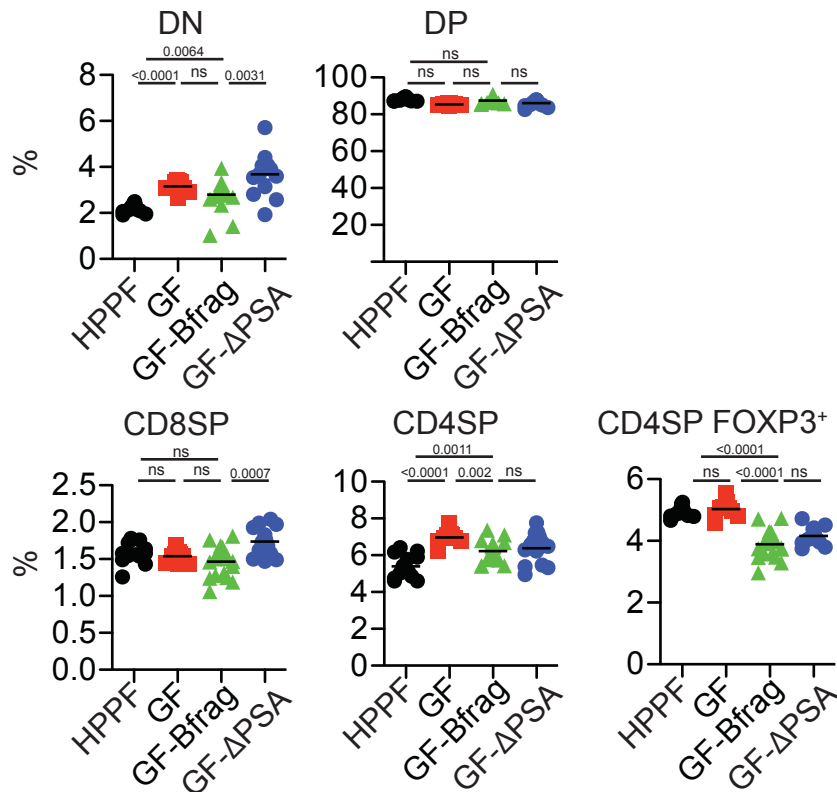

## B SPLEEN

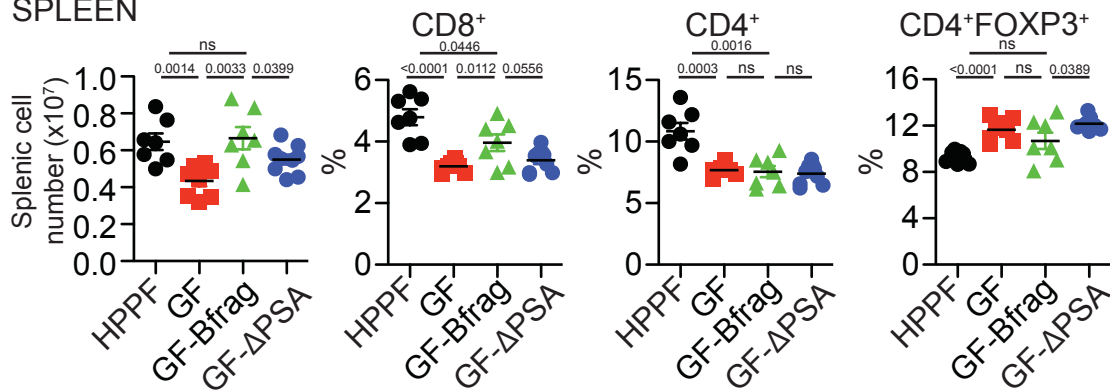

**Figure S1: Distribution of major T cell subsets in thymus and spleen of HPPF, GF, GF-Bfrag and GF- $\Delta$ PSA pups.**

**A.** Frequency of thymic DN (CD4<sup>neg</sup>CD8a<sup>neg</sup>), DP (CD4<sup>+</sup>CD8a<sup>+</sup>), CD8SP (CD4<sup>neg</sup>CD8<sup>+</sup>), CD4SP (CD4<sup>+</sup>CD8a<sup>neg</sup>) and CD4SP FOXP3<sup>+</sup> cells (gated on CD4SP) (HPPF n= 12; GF n=8; GF-Bfrag n=18; GF- $\Delta$ PSA n=14).

**B.** Total splenic cellularity and frequency of CD8<sup>+</sup>, CD4<sup>+</sup> (gated on Live) and CD4<sup>+</sup>FOXP3<sup>+</sup> cells (gated on CD4<sup>+</sup> T cells) (HPPF n= 7; GF n=8; GF-Bfrag n=7; GF- $\Delta$ PSA n=9).

Data are from 2-3 independent experiments for each group. Bars are Mean  $\pm$  SEM.

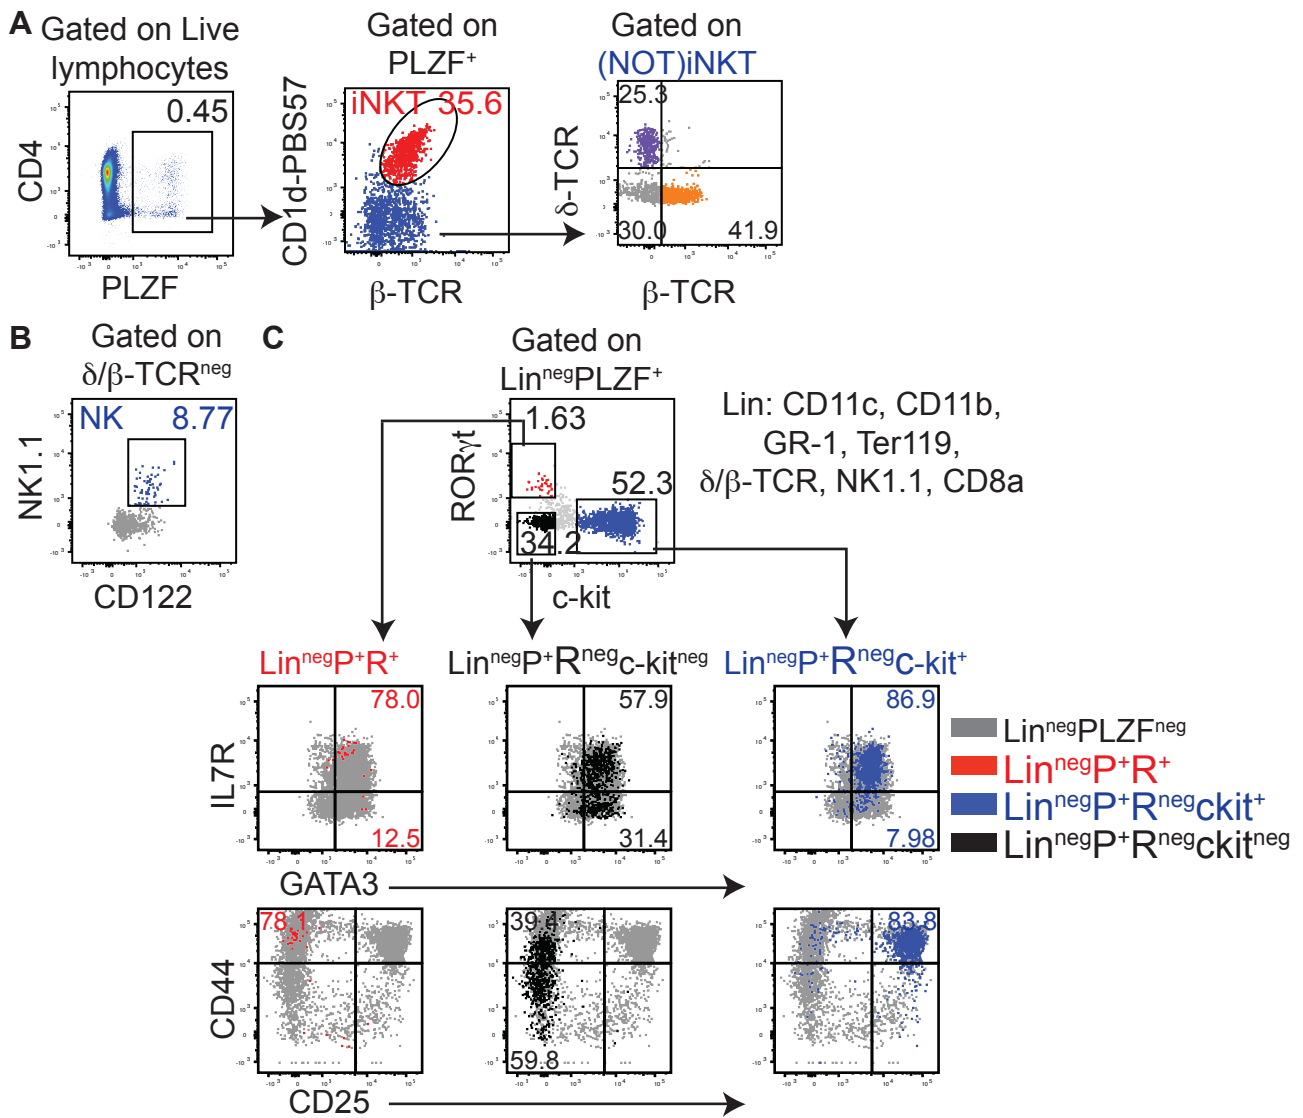

**Figure S2: Identification of PLZF expressing cell subsets by flow cytometry**

Gating strategy to identify PLZF expressing cell subsets in the thymus of 14 days old C57BL/6 pups. Live and single lymphocytes were analyzed as follows:

**A.** (Left) Representative flow cytometry plot showing expression of PLZF (y-axis) and CD4 (x-axis) to identify total PLZF<sup>+</sup> cells. (Middle) PLZF<sup>+</sup> cells were next analyzed for β-TCR (x-axis) and mCD1d-PBS57 tetramer (y-axis) expression to identify mCD1d-PBS57<sup>+</sup>TCRβ<sup>+</sup> iNKT cells. (Right) A (NOT)iNKT gate was used to determine expression of β-TCR (x-axis) and δ-TCR (y-axis) on mCD1d-PBS57<sup>neg</sup> cells to identify PLZF<sup>+</sup>γδ T cells and PLZF<sup>+</sup> innate-like αβ-T cells.

**B.** PLZF<sup>+</sup> cells were gated on β/δ-TCR<sup>neg</sup> cells and analyzed for expression of CD122 (x-axis) and NK1.1 (y-axis) to identify NK cells.

**C.** TCR<sup>neg</sup>NK1.1<sup>neg</sup>PLZF<sup>+</sup> cells that were also Lin<sup>neg</sup> (Lin: CD11c, CD11b, Ter119, CD19, GR-1 and CD8a) were analyzed for expression of c-kit (x-axis) and RORγt (y-axis). Cells identified as Lin<sup>neg</sup>PLZF<sup>+</sup>RORγt<sup>+</sup> (Lin<sup>neg</sup>P<sup>+</sup>R<sup>+</sup> in red), Lin<sup>neg</sup>PLZF<sup>+</sup>c-kit<sup>+</sup> (Lin<sup>neg</sup>P<sup>+</sup>c-kit<sup>+</sup> in blue) and Lin<sup>neg</sup>PLZF<sup>+</sup>c-kit<sup>neg</sup> (Lin<sup>neg</sup>P<sup>+</sup>c-kit<sup>neg</sup> in black) cells were further analyzed for expression of (top row) GATA3 (x-axis) and IL7R (y-axis) and (bottom row) CD25 (x-axis) and CD44 (y-axis).

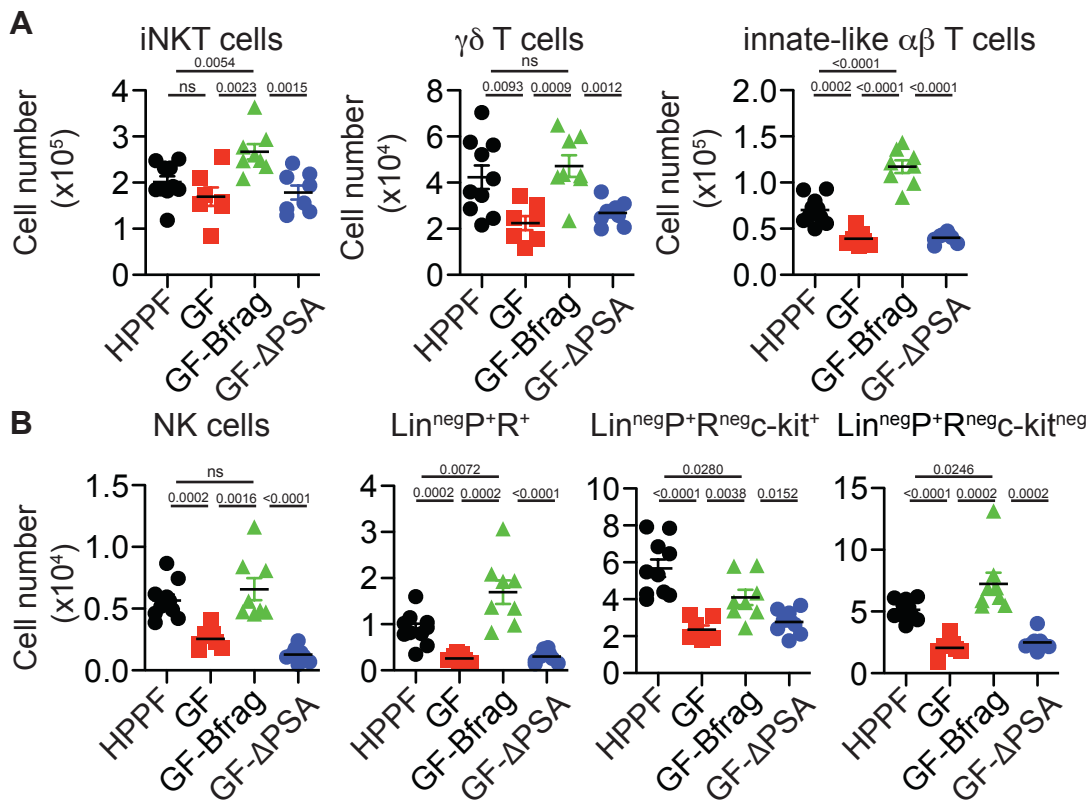

**Figure S3: Cell numbers of PLZF-expressing subsets in thymus of HPPF, GF, GF-Bfrag and GF- $\Delta$ PSA pups.**

**A.** Total numbers of PLZF<sup>+</sup> iNKT cells, PLZF<sup>+</sup>  $\gamma\delta$  T cells and PLZF<sup>+</sup> innate-like  $\alpha\beta$ -T cells (HPPF n= 10; GF n=7; GF-Bfrag n=8; GF- $\Delta$ PSA n=8).

**B.** Total numbers of PLZF<sup>+</sup> NK cells,  $\text{Lin}^{\text{neg}}\text{PLZF}^+\text{ROR}\gamma\text{t}^+$  cells,  $\text{Lin}^{\text{neg}}\text{PLZF}^+\text{ROR}\gamma\text{t}^{\text{neg}}\text{c-kit}^+$  cells and  $\text{Lin}^{\text{neg}}\text{PLZF}^+\text{ROR}\gamma\text{t}^{\text{neg}}\text{c-kit}^{\text{neg}}$  cells (HPPF n= 10; GF n=7; GF-Bfrag n=8; GF- $\Delta$ PSA n=8).

Data are representative of 2-3 experiments for each group. Bars are Mean  $\pm$  SEM.



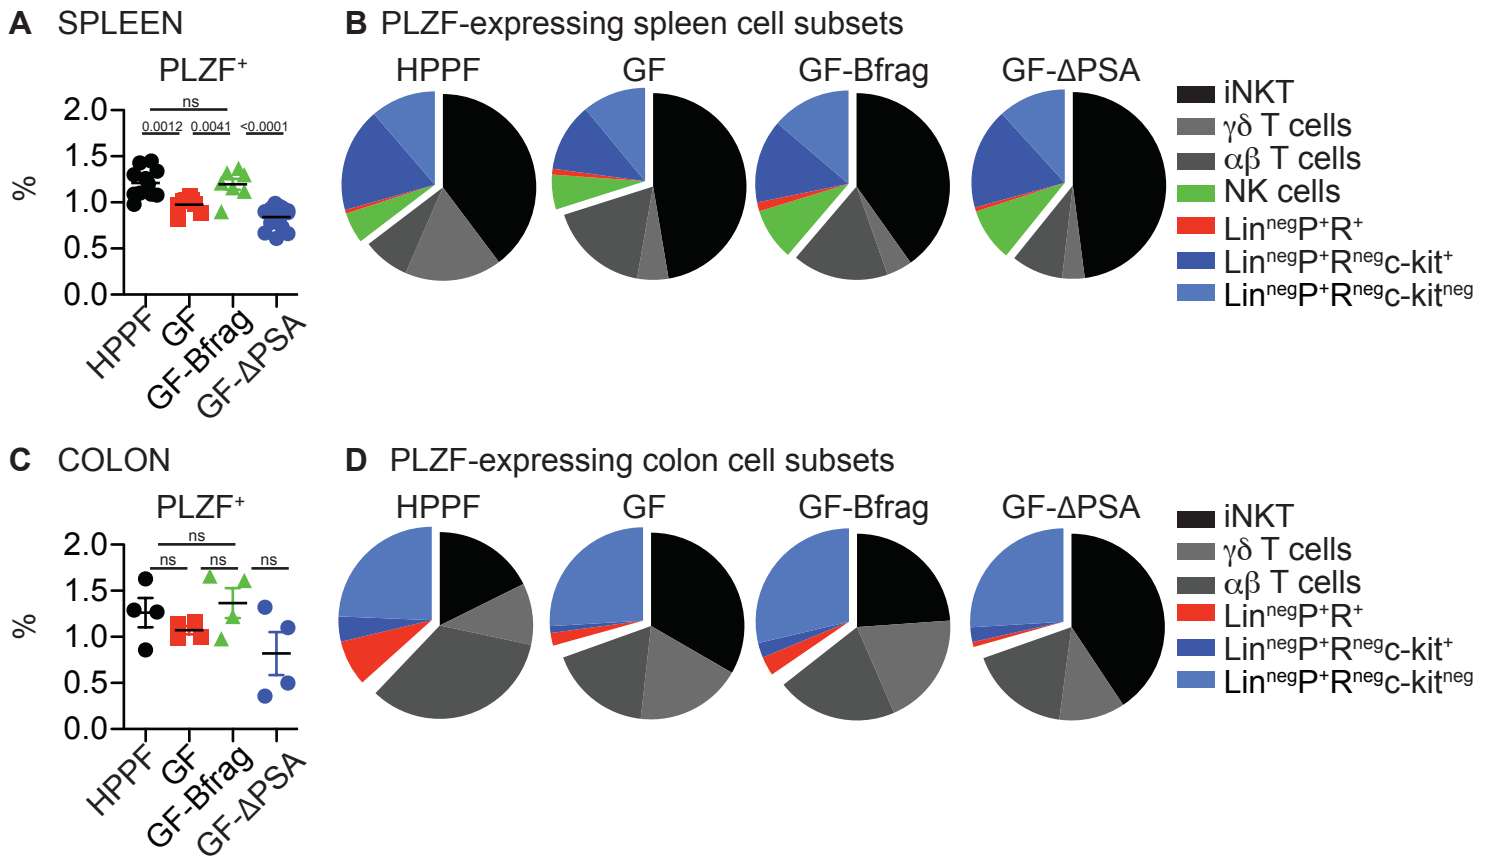

**Figure S4: Frequency of PLZF<sup>+</sup> cells in spleen and colon of HPPF, GF, GF-Bfrag and GF-ΔPSA pups.**

**A.** Frequency of PLZF<sup>+</sup> cells in spleen (HPPF n= 11; GF n=8; GF-Bfrag n=7; GF-ΔPSA n=17). Data are from of 2-3 experiments in each group.

**B.** Pie graphs showing distribution of indicated PLZF expressing cell subsets in spleen.

**C.** Frequency of PLZF<sup>+</sup> cells in colon (HPPF n= 4; GF n=4; GF-Bfrag n=4; GF-ΔPSA n=4). Data are representative of 2 independent experiments.

**D.** Pie graphs showing distribution of indicated PLZF expressing cell subsets in colon. Bars are Mean  $\pm$  SEM.

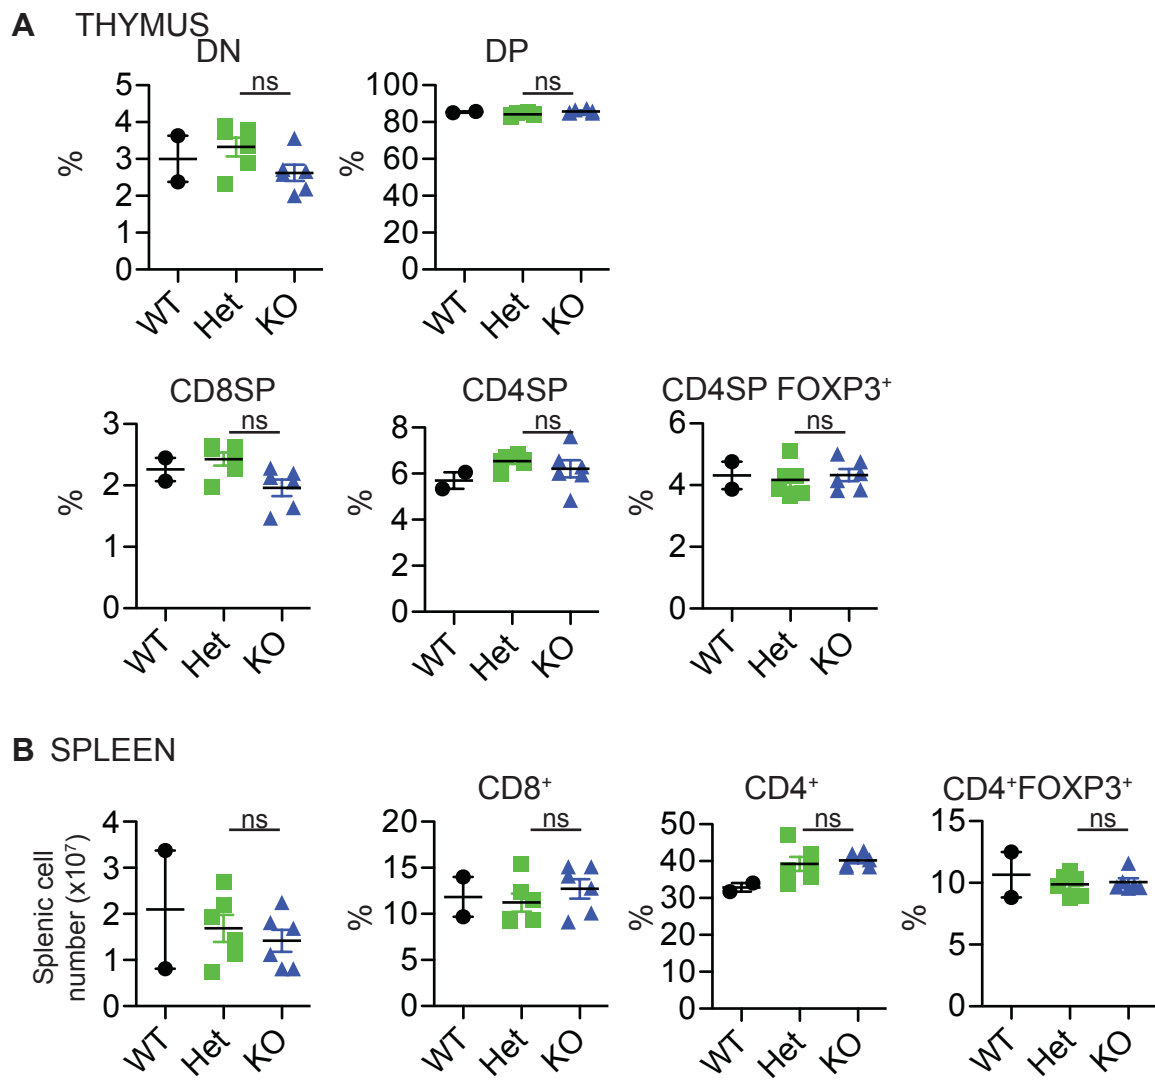

**Figure S5: Distribution of major T cell subsets in thymus and spleen of infant *Tlr2*<sup>-/-</sup> mice**

**A.** Frequency of thymic DN, DP, CD8SP, CD4SP and CD4SP FOXP3<sup>+</sup> cells (WT n= 2; HET n=6; KO n=6).

**B.** Total splenic cellularity and frequency of CD8<sup>+</sup>, CD4<sup>+</sup> and CD4<sup>+</sup>FOXP3<sup>+</sup> cells (WT n= 2; HET n=6; KO n=6).

Data are from 2 experiments. Bars are Mean  $\pm$  SEM.

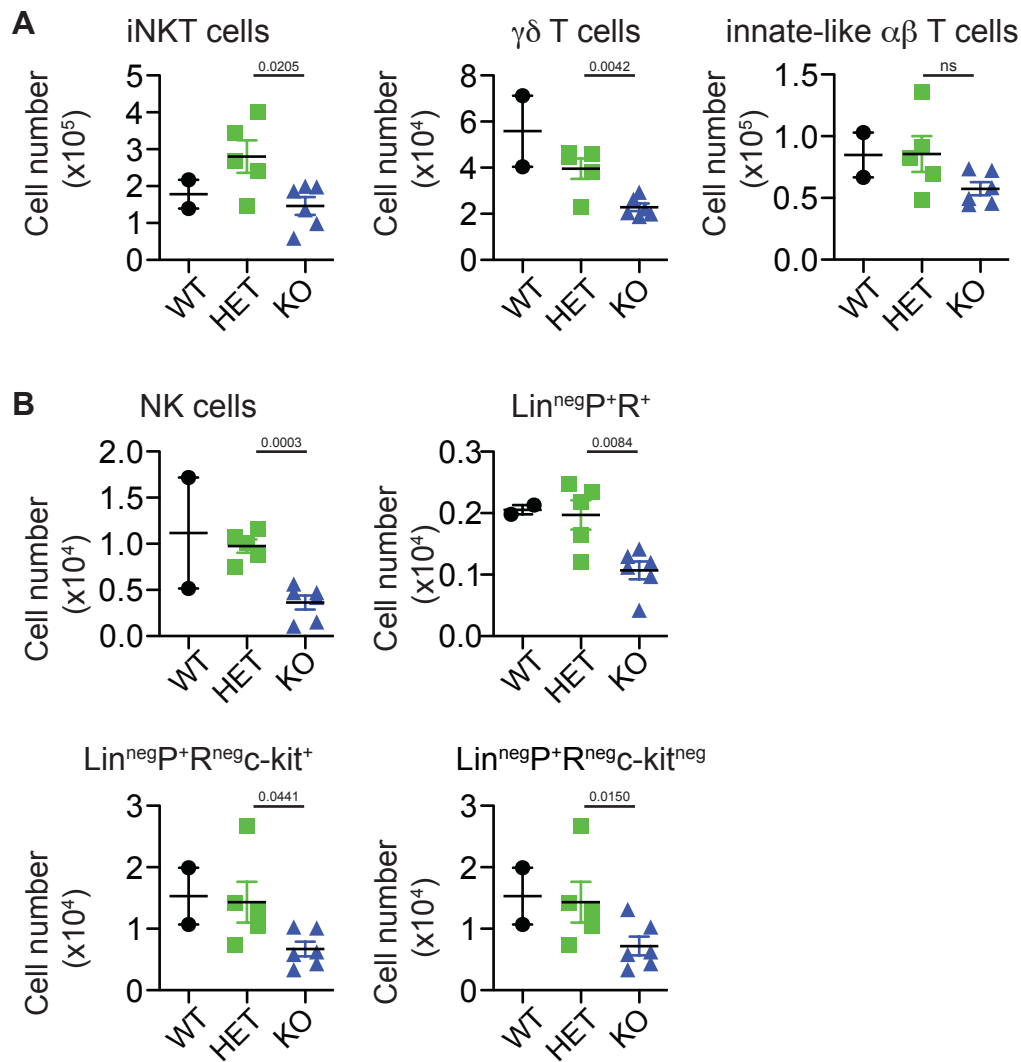

**Figure S6: Cell numbers of PLZF-expressing cell subsets in thymus of infant *Tlr2*<sup>-/-</sup> mice.**

**A.** Total numbers of PLZF<sup>+</sup> iNKT cells, PLZF<sup>+</sup>  $\gamma\delta$  T cells and PLZF<sup>+</sup> innate-like  $\alpha\beta$ -T cells (WT n= 2; HET n=5; KO n=6).

**B.** Total numbers of PLZF<sup>+</sup> NK cells,  $\text{Lin}^{\text{neg}}\text{PLZF}^+\text{ROR}\gamma\text{t}^+$  cells,  $\text{Lin}^{\text{neg}}\text{PLZF}^+\text{ROR}\gamma\text{t}^{\text{neg}}\text{c-kit}^+$  cells and  $\text{Lin}^{\text{neg}}\text{PLZF}^+\text{ROR}\gamma\text{t}^{\text{neg}}\text{c-kit}^{\text{neg}}$  cells (WT n= 2; HET n=5; KO n=6).

Data are from 2 experiments. Bars are Mean  $\pm$  SEM.

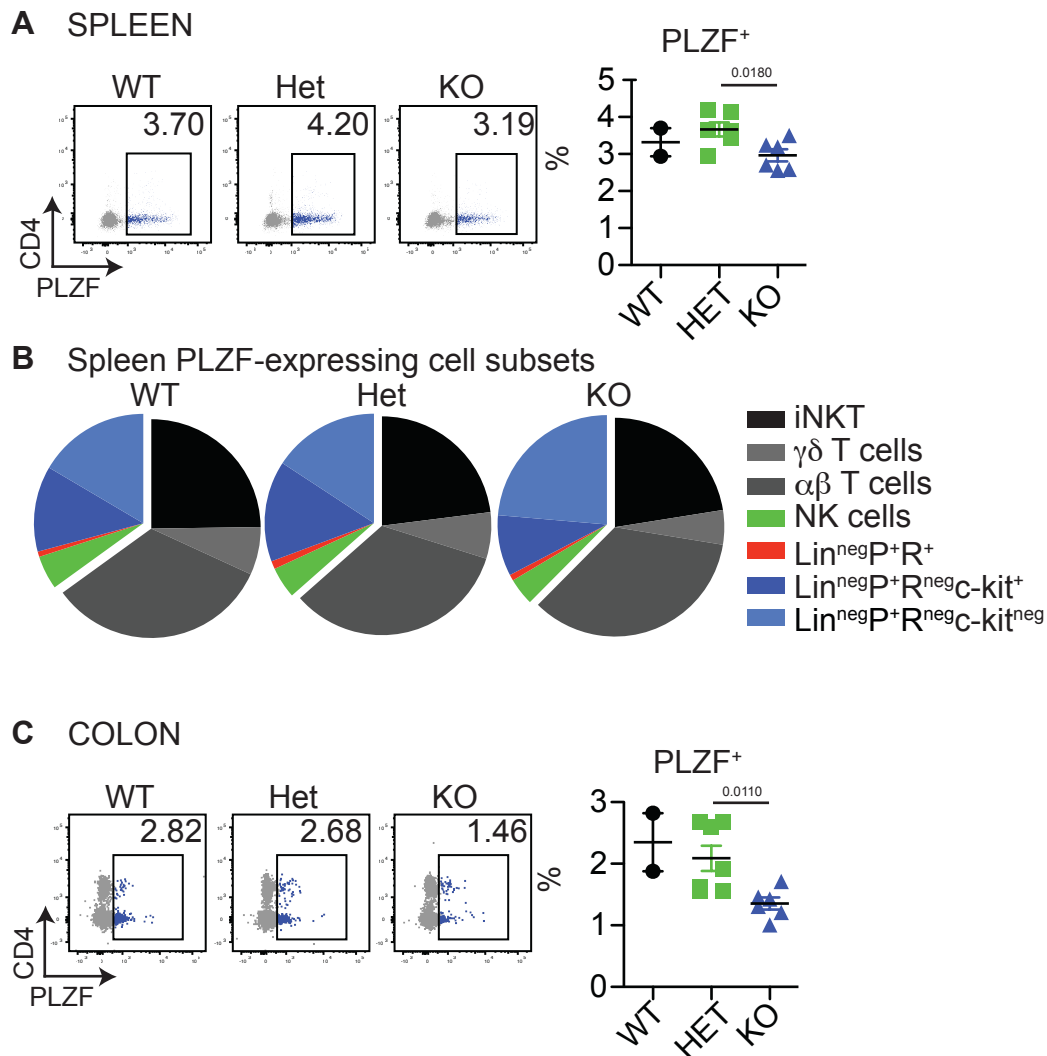

**Figure S7: Frequency of PLZF expressing subsets in spleen and colon of infant *Tlr2*<sup>-/-</sup> mice.**

**A.** Frequency of PLZF<sup>+</sup> cells in spleen (WT n= 2; HET n=6; KO n=6).

**B.** Pie graphs showing distribution of indicated PLZF expressing cell subsets in spleen.

**C.** Frequency of PLZF<sup>+</sup> cells in colon (WT n= 2; HET n=5; KO n=6).

Data in A-C are from 2 independent experiments. Bars are Mean  $\pm$  SEM.

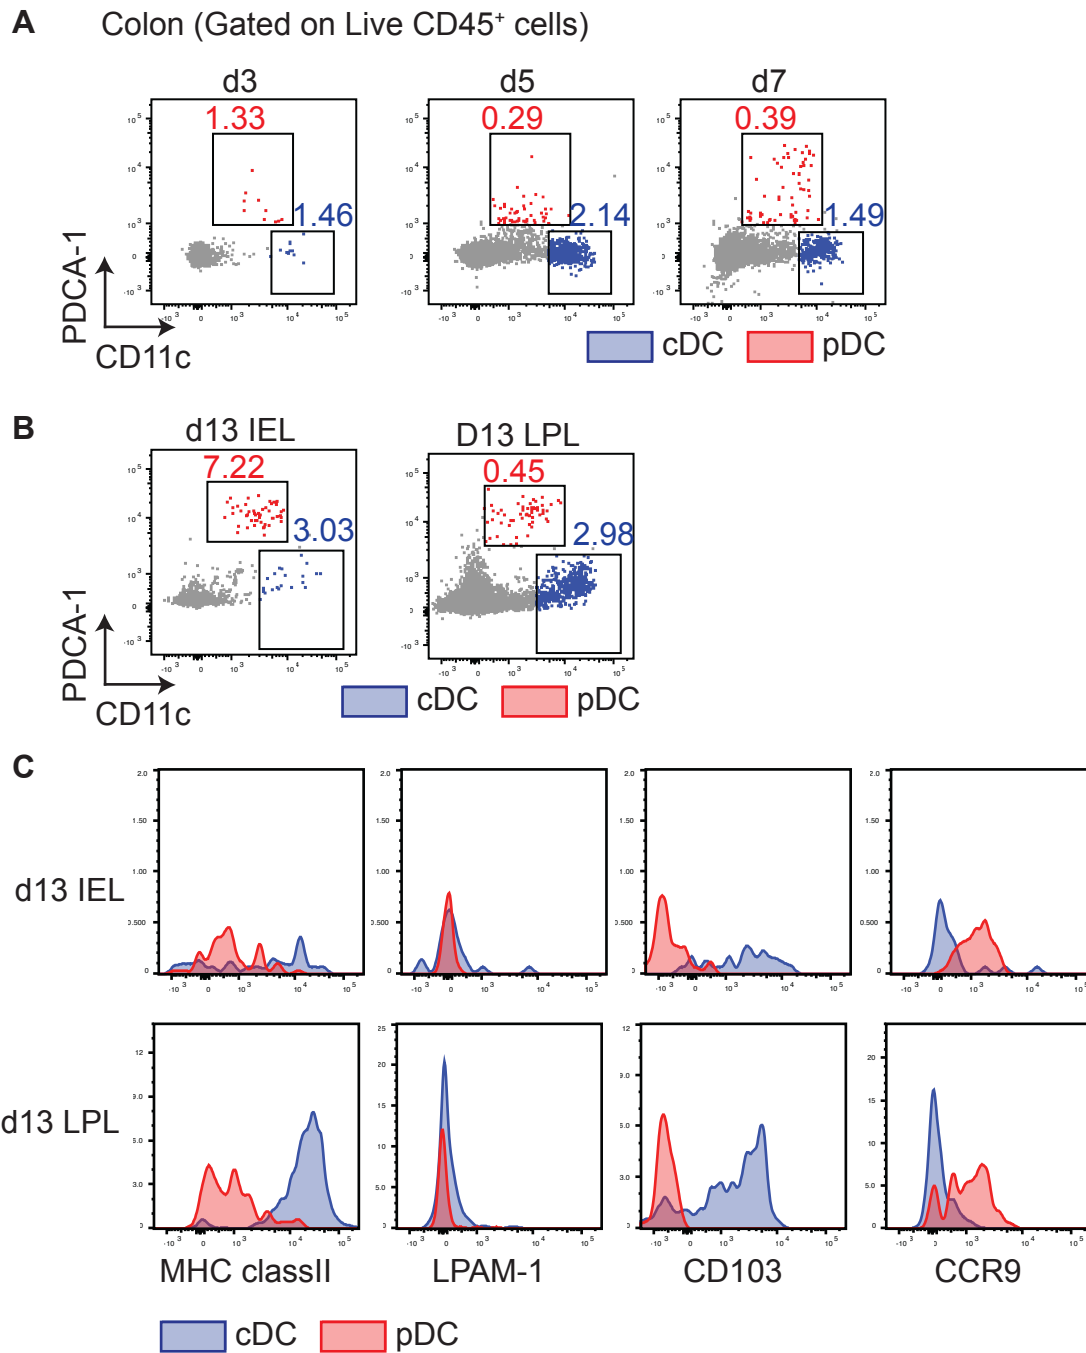

**Figure S8: Colonic pDCs in conventionally-housed infant C57BL/6 mice.**

**A.** Representative flow cytometry dot plots showing expression of CD11c (x-axis) and PDCA-1 (y-axis) in colonic lymphocyte preparations from 3, 5 and 7 days old C57BL/6 pups. Frequency of pDCs (CD11<sup>+</sup>PDCA-1<sup>+</sup>) and cDCs (CD11c<sup>hi</sup>PDCA-1<sup>neg</sup>) is shown.

**B.** Representative flow cytometry dot plots showing expression of CD11c (x-axis) and PDCA-1 (y-axis) in colonic intra-epithelial lymphocyte (IEL) and lamina propria lymphocyte (LPL) preparations from 13 days old C57BL/6 pups. Frequency of pDCs and cDCs is shown.

**C.** Histogram overlays of cDCs (blue) and pDCs (red) in IEL and LPL fractions showing expression of MHC class II, LPAM-1, CD103 and CCR9.

Data are representative of 2 independent experiments.

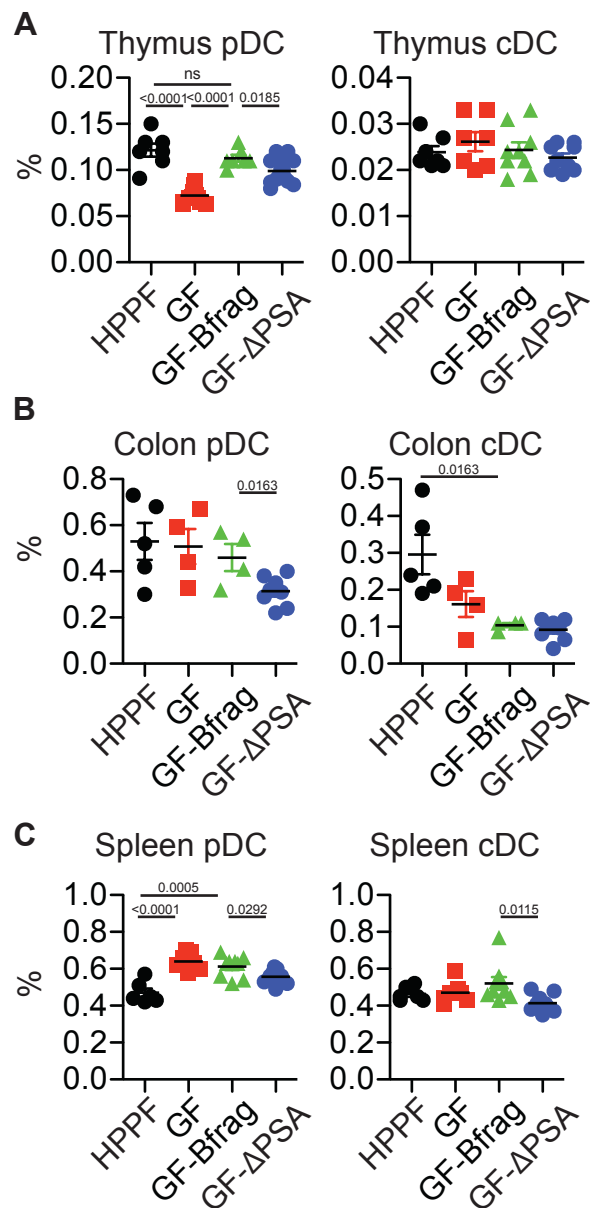

**Figure S9: Distribution of pDCs and cDCs in colon, spleen and thymus of d14 GF and monocolonized mice**

**A-C.** Frequency of pDCs and cDCs in the thymus (HPPF  $n=7$ ; GF  $n=12$ ; GF-Bfrag  $n=7$ ; GF-ΔPSA  $n=15$ ), colon (HPPF  $n=5$ ; GF  $n=4$ ; GF-Bfrag  $n=4$ ; GF-ΔPSA  $n=8$ ) and spleen (HPPF  $n=6$ ; GF  $n=7$ ; GF-Bfrag  $n=9$ ; GF-ΔPSA  $n=9$ ) is shown.

Data are representative of at least 2 independent experiments. Bars are Mean  $\pm$  SEM.

| Figure S10: RNA-seq analysis of thymic pDCs from <i>B. fragilis</i> (GF-Bfrag) or PSA mutant <i>B. fragilis</i> (GF-ΔPSA) monoclonalized GF mice. |               |               |               |         |               |         |               |                |         |          |        |     |     |               |              |
|---------------------------------------------------------------------------------------------------------------------------------------------------|---------------|---------------|---------------|---------|---------------|---------|---------------|----------------|---------|----------|--------|-----|-----|---------------|--------------|
|                                                                                                                                                   | a1            | a2            | a3            | a4      | a5            | a6      | a7            | a8             | a9      | a10      | a11    | a12 | a13 | a14           | a15          |
| 1                                                                                                                                                 | Gm37347       | Fam102a       | Cyb5r1        | Gpr174  | Vcam1         | Ccr7    | C3            | Cmah           | Xpnp3   | Smco4    | Zfp324 |     |     | Xist          | Spata2l      |
| 2                                                                                                                                                 | Gm13919       | Ormdl1        | Stxbp5        | Mir378b | Zfp46         | Gm14636 | Csf1r         | Gm38014        | Sic28a2 | Cd151    |        |     |     | Pla2g2d       | Rpp25f       |
| 3                                                                                                                                                 | Emid1         | A530099J19Rik | H2-Ob         | Tmem2   | Rpain         | Cas21   | Arhgef2       | Pou2af1        |         | Dnajc11  |        |     |     | Oprd1         | Stard4       |
| 4                                                                                                                                                 | Gm8369        | Fasikd5       | Gm16982       | Bend4   | Nod1          | Zc2hc1a | Sepp1         | RP24-351O18.4  |         | Tnfrsf21 |        |     |     | Tnfrsf11a     | Gm16337      |
| 5                                                                                                                                                 | Gm15903       | Mcm8          | Ndrp1         | Gm13528 | Meaf6         | Timm22  | Col27a1       | Gm16310        |         | Wdfy3    |        |     |     | Vdr41         | Ydjc         |
| 6                                                                                                                                                 | Gm38387       | RP23-21416.2  | Ppap2a        | Sic30a1 | Nav1          |         | Psen2         | Sic43a2        |         | Rab31    |        |     |     | Taf5l         | Il18         |
| 7                                                                                                                                                 | Sic36a3       | Acot6         | Aftph         | Igkc    | Atxn1         |         | Xdh           | Gm11131        |         | Vps37c   |        |     |     | Adam22        | Oip5         |
| 8                                                                                                                                                 | Gdpp1         |               | E130311K13Rik |         | Ccdc71        |         | Phf11c        | Pkd1l3         |         | Fmn1     |        |     |     | RP23-231L15.4 | RP23-132D7.2 |
| 9                                                                                                                                                 | Gm24452       |               | Fasn          |         | Tiam1         |         | Igsf3         | B230317F23Rik  |         | Ms4a6b   |        |     |     | Clec4n        | Adora2a      |
| 10                                                                                                                                                | A630072L19Rik |               | Aire          |         | Papp2         |         | Rps13-ps1     | Zbtb11os1      |         | Gpnmb    |        |     |     | Rnf145        | Pla2g12a     |
| 11                                                                                                                                                | Gf3c5         |               | Zak           |         | Cdc3          |         | Plekhh2       | Exd2           |         | Cistn1   |        |     |     | Sic12a2       | Cd99l2       |
| 12                                                                                                                                                |               |               | Ptpn22        |         | Arb1          |         | Plekhn1       | Tmem140        |         | Il18bp   |        |     |     | Tin           | Gm14730      |
| 13                                                                                                                                                |               |               | Pygl          |         | Anxa4         |         | Bcor          | Ppp1r9a        |         | Rtp4     |        |     |     | Nid1          |              |
| 14                                                                                                                                                |               |               | Bsdcl1        |         | Lrp5          |         | Siglec1       | RP23-158A20.7  |         | Clec7a   |        |     |     | Fam26f        |              |
| 15                                                                                                                                                |               |               | Itprnl2       |         | Chst2         |         | Itga9         | Ccdc93         |         | Med4     |        |     |     | Rbbp8         |              |
| 16                                                                                                                                                |               |               | Matr3         |         | Zdhhc24       |         | Egr1          | 2210016L21Rik  |         | Adck5    |        |     |     | Oas2          |              |
| 17                                                                                                                                                |               |               | Tmem236       |         | Gfra2         |         | Ppm1g         | Sic16a5        |         | Bcl9     |        |     |     | Tmprss6       |              |
| 18                                                                                                                                                |               |               | Rras2         |         | Lpl           |         | Hist1h2bl     | 1700001D01Rik  |         | Gaint10  |        |     |     | Anxa3         |              |
| 19                                                                                                                                                |               |               | F2r2          |         | Neur1b        |         | Taf11         | Gm17146        |         | Ostm1    |        |     |     | Igf2r         |              |
| 20                                                                                                                                                |               |               | Gm4876        |         | Polr3e        |         | Iah1          | Ldoc1l         |         | Spg21    |        |     |     | Adamdec1      |              |
| 21                                                                                                                                                |               |               | Lcorl         |         | Scamp1        |         | Furin         | Zfp948         |         | Rnf144b  |        |     |     | Fgl2          |              |
| 22                                                                                                                                                |               |               | Klf8          |         | Gca           |         | Ar4c          | RP23-454A14.10 |         | Agm      |        |     |     | Xcr1          |              |
| 23                                                                                                                                                |               |               | Gm34727       |         | Nrip1b        |         | Myo6          | Wbscr16        |         | Top3a    |        |     |     | Rab31f        |              |
| 24                                                                                                                                                |               |               | Tmem164       |         | Gla           |         | Kenn4         | Ccdc88c        |         | Olfir433 |        |     |     | Mex3b         |              |
| 25                                                                                                                                                |               |               | Disc1         |         | Mcm10         |         | Abcc5         | Elmod3         |         | Pame3    |        |     |     | Sic37a3       |              |
| 26                                                                                                                                                |               |               | Gm37699       |         | Hnmp1         |         | Gm14446       | Cbr2           |         | Asah2    |        |     |     | Epb4.1i3      |              |
| 27                                                                                                                                                |               |               | Adap1         |         | Sic7a8        |         | Cyp4v3        | Atxn7          |         | Pex5     |        |     |     | Brap          |              |
| 28                                                                                                                                                |               |               | Taf4b         |         | Ddx60         |         | Strp2         | 9230114K14Rik  |         | Lyz2     |        |     |     | Sxbp1         |              |
| 29                                                                                                                                                |               |               | Nccrp1        |         | Hif1an        |         | Cdc20         | Gm14212        |         | Ptms     |        |     |     | Anpep         |              |
| 30                                                                                                                                                |               |               | Rarg          |         | Igfa6         |         | Tbxas1        | Malsu1         |         | Tmem26   |        |     |     | Ccl12         |              |
| 31                                                                                                                                                |               |               | Pet100        |         | 2900026A02Rik |         | Ptgs1         | Msh5           |         | Selo     |        |     |     | Dusp16        |              |
| 32                                                                                                                                                |               |               | Phf19         |         | Tut1          |         | Gins2         | Ifo1           |         |          |        |     |     | Il6st         |              |
| 33                                                                                                                                                |               |               | Apol7c        |         | Focad         |         | Ifi204        | Bsn            |         |          |        |     |     | Ifnlr1        |              |
| 34                                                                                                                                                |               |               | Zfp277        |         | Ttc39b        |         | Osbpl3        | Vsig10         |         |          |        |     |     | Arhgef40      |              |
| 35                                                                                                                                                |               |               | Ptpn11        |         | Pid1          |         | Gm28933       | Pias2          |         |          |        |     |     | Ccdc91        |              |
| 36                                                                                                                                                |               |               | 1700056E22Rik |         | Mllt6         |         | RP23-2C16.2   | Fsd1l          |         |          |        |     |     | Dusp19        |              |
| 37                                                                                                                                                |               |               | Sic25a30      |         |               |         | Tyh3          | Gm38147        |         |          |        |     |     | 9330175E14Rik |              |
| 38                                                                                                                                                |               |               | Pabpc4        |         |               |         | Zfp949        | Rabl2          |         |          |        |     |     | Gm37570       |              |
| 39                                                                                                                                                |               |               | F830112A20Rik |         |               |         | Mogs          | L2hgdh         |         |          |        |     |     | RP24-176P19.6 |              |
| 40                                                                                                                                                |               |               | H2-Dmb2       |         |               |         | Rplf2         | I7Rn6          |         |          |        |     |     | Scaf1         |              |
| 41                                                                                                                                                |               |               | Mboat1        |         |               |         | Ddx49         | Strbp          |         |          |        |     |     | Asb2          |              |
| 42                                                                                                                                                |               |               | Tgfr2         |         |               |         | C1qc          | Prdm11         |         |          |        |     |     | Nab2          |              |
| 43                                                                                                                                                |               |               |               |         |               |         | Mtf1          | Gm22639        |         |          |        |     |     | 9130221H12Rik |              |
| 44                                                                                                                                                |               |               |               |         |               |         | Cisd1         | Gm37368        |         |          |        |     |     | Zfp366        |              |
| 45                                                                                                                                                |               |               |               |         |               |         | Kctd6         | Adam33         |         |          |        |     |     | Acp5          |              |
| 46                                                                                                                                                |               |               |               |         |               |         | Phtf2         | Bcl7a          |         |          |        |     |     | Sic36a1       |              |
| 47                                                                                                                                                |               |               |               |         |               |         | Zfp54         | Rbx2           |         |          |        |     |     | Trm61a        |              |
| 48                                                                                                                                                |               |               |               |         |               |         | A730011C13Rik | Gm37873        |         |          |        |     |     | Utp14b        |              |
| 49                                                                                                                                                |               |               |               |         |               |         | Al846148      | Ubxn11         |         |          |        |     |     | Sigmar1       |              |
| 50                                                                                                                                                |               |               |               |         |               |         | Clec4a1       | Zfp524         |         |          |        |     |     | Zfp180        |              |
| 51                                                                                                                                                |               |               |               |         |               |         | A430033K04Rik | Sic25a23       |         |          |        |     |     | Gm15965       |              |
| 52                                                                                                                                                |               |               |               |         |               |         | Wdr78         | Nudt7          |         |          |        |     |     | Serpinf1      |              |
| 53                                                                                                                                                |               |               |               |         |               |         | Map4k5        | Csrp2          |         |          |        |     |     | Sic41a3       |              |
| 54                                                                                                                                                |               |               |               |         |               |         | Pck2          | Ccl2           |         |          |        |     |     | G77080        |              |
| 55                                                                                                                                                |               |               |               |         |               |         | Zfp874a       | RP23-422D12.3  |         |          |        |     |     | Nfkb          |              |
| 56                                                                                                                                                |               |               |               |         |               |         | Gnal          | Dok3           |         |          |        |     |     | Doc2g         |              |
| 57                                                                                                                                                |               |               |               |         |               |         | Zfp395        | Cyp26c1        |         |          |        |     |     | Ggh           |              |
| 58                                                                                                                                                |               |               |               |         |               |         | Dnajc17       | Impa1          |         |          |        |     |     | Gid8          |              |
| 59                                                                                                                                                |               |               |               |         |               |         | Gbp2          | Gm4258         |         |          |        |     |     | Dnajb2        |              |
| 60                                                                                                                                                |               |               |               |         |               |         | Cdkn1a        | Pla2g4f        |         |          |        |     |     | Repin1        |              |
| 61                                                                                                                                                |               |               |               |         |               |         | Rpl36a        | Nanos1         |         |          |        |     |     | Timd4         |              |
| 62                                                                                                                                                |               |               |               |         |               |         | Fn1           | Gm16675        |         |          |        |     |     | Gas21         |              |
| 63                                                                                                                                                |               |               |               |         |               |         | Anxa1         |                |         |          |        |     |     | Spred3        |              |
| 64                                                                                                                                                |               |               |               |         |               |         | Hmox1         |                |         |          |        |     |     | Fosl2         |              |
| 65                                                                                                                                                |               |               |               |         |               |         | Pgap1         |                |         |          |        |     |     | Loxl3         |              |
| 66                                                                                                                                                |               |               |               |         |               |         | Klrn2         |                |         |          |        |     |     | Lfng          |              |
| 67                                                                                                                                                |               |               |               |         |               |         | Abcc3         |                |         |          |        |     |     | Haus4         |              |
| 68                                                                                                                                                |               |               |               |         |               |         | Timm23        |                |         |          |        |     |     | Gm37590       |              |
| 69                                                                                                                                                |               |               |               |         |               |         | Trim23        |                |         |          |        |     |     | Arntl         |              |
| 70                                                                                                                                                |               |               |               |         |               |         | Zcchc9        |                |         |          |        |     |     | Rhobtb1       |              |
| 71                                                                                                                                                |               |               |               |         |               |         | Myof          |                |         |          |        |     |     | 2610012C04Rik |              |
| 72                                                                                                                                                |               |               |               |         |               |         | Gm28466       |                |         |          |        |     |     | Vps18         |              |
| 73                                                                                                                                                |               |               |               |         |               |         | Gcfc2         |                |         |          |        |     |     | Gm29151       |              |
| 74                                                                                                                                                |               |               |               |         |               |         | Kcnj10        |                |         |          |        |     |     | Acot11        |              |
| 75                                                                                                                                                |               |               |               |         |               |         | Rab9          |                |         |          |        |     |     | Msh2          |              |
| 76                                                                                                                                                |               |               |               |         |               |         | Inip          |                |         |          |        |     |     | Pld1          |              |
| 77                                                                                                                                                |               |               |               |         |               |         | Lig3          |                |         |          |        |     |     | 2810429I04Rik |              |
| 78                                                                                                                                                |               |               |               |         |               |         | Fcgr1         |                |         |          |        |     |     | Gm22733       |              |
| 79                                                                                                                                                |               |               |               |         |               |         |               |                |         |          |        |     |     | Jazf1         |              |
| 80                                                                                                                                                |               |               |               |         |               |         |               |                |         |          |        |     |     | Vipr1         |              |
| 81                                                                                                                                                |               |               |               |         |               |         |               |                |         |          |        |     |     | Fzd5          |              |
| 82                                                                                                                                                |               |               |               |         |               |         |               |                |         |          |        |     |     | Lnc20         |              |
| 83                                                                                                                                                |               |               |               |         |               |         |               |                |         |          |        |     |     | Phldb1        |              |
| 84                                                                                                                                                |               |               |               |         |               |         |               |                |         |          |        |     |     | Aif1          |              |
| 85                                                                                                                                                |               |               |               |         |               |         |               |                |         |          |        |     |     | Polmt         |              |
| 86                                                                                                                                                |               |               |               |         |               |         |               |                |         |          |        |     |     | Ms4a7         |              |
| 87                                                                                                                                                |               |               |               |         |               |         |               |                |         |          |        |     |     | Orn3          |              |
| 88                                                                                                                                                |               |               |               |         |               |         |               |                |         |          |        |     |     | Serf2         |              |
| 89                                                                                                                                                |               |               |               |         |               |         |               |                |         |          |        |     |     | Vdr34         |              |
| 90                                                                                                                                                |               |               |               |         |               |         |               |                |         |          |        |     |     | Prdm1         |              |
| 91                                                                                                                                                |               |               |               |         |               |         |               |                |         |          |        |     |     | Ect2          |              |
| 92                                                                                                                                                |               |               |               |         |               |         |               |                |         |          |        |     |     | Rgs3          |              |
| 93                                                                                                                                                |               |               |               |         |               |         |               |                |         |          |        |     |     | Stap2         |              |
| 94                                                                                                                                                |               |               |               |         |               |         |               |                |         |          |        |     |     | Pitpnm1       |              |
| 95                                                                                                                                                |               |               |               |         |               |         |               |                |         |          |        |     |     | Oas1b         |              |
| 96                                                                                                                                                |               |               |               |         |               |         |               |                |         |          |        |     |     | Lpcat4        |              |
| 97                                                                                                                                                |               |               |               |         |               |         |               |                |         |          |        |     |     | Chmp7         |              |
| 98                                                                                                                                                |               |               |               |         |               |         |               |                |         |          |        |     |     | Mettl13       |              |
| 99                                                                                                                                                |               |               |               |         |               |         |               |                |         |          |        |     |     | Mical2        |              |
| 100                                                                                                                                               |               |               |               |         |               |         |               |                |         |          |        |     |     | Gp49a         |              |
| 101                                                                                                                                               |               |               |               |         |               |         |               |                |         |          |        |     |     | Gm13710       |              |
| 102                                                                                                                                               |               |               |               |         |               |         |               |                |         |          |        |     |     | Olf99         |              |

**Figure S10: RNA-seq analysis of thymic pDCs from GF, GF-Bfrag and GF-ΔPSA monoclonalized mice**  
 Genes in each numbered section (superscript) of the Venn diagram in **Figure 3F**.

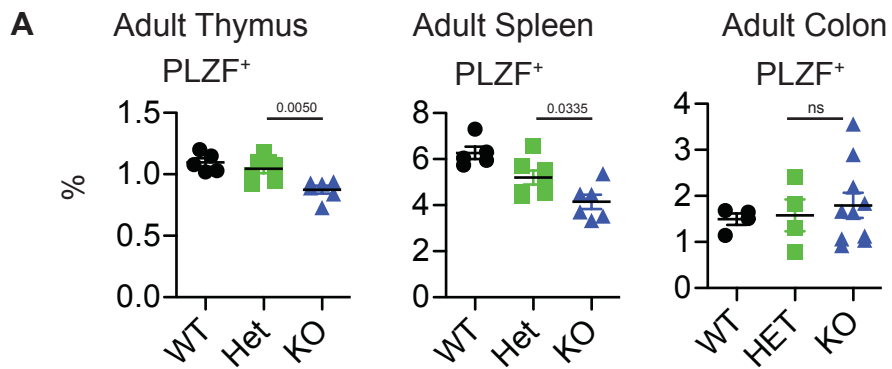

**Figure S11: Frequency of PLZF expressing subsets in thymus, spleen and colon of adult *Tlr2*<sup>-/-</sup> mice.**

**A.** Frequency of PLZF<sup>+</sup> cells in thymus, spleen and colon of adult (d48-55) mice (Thymus, Spleen: WT n= 5; HET n=7; KO n=6; Colon: WT n= 4; HET n=4; KO n=10).

Bars are Mean  $\pm$  SEM.



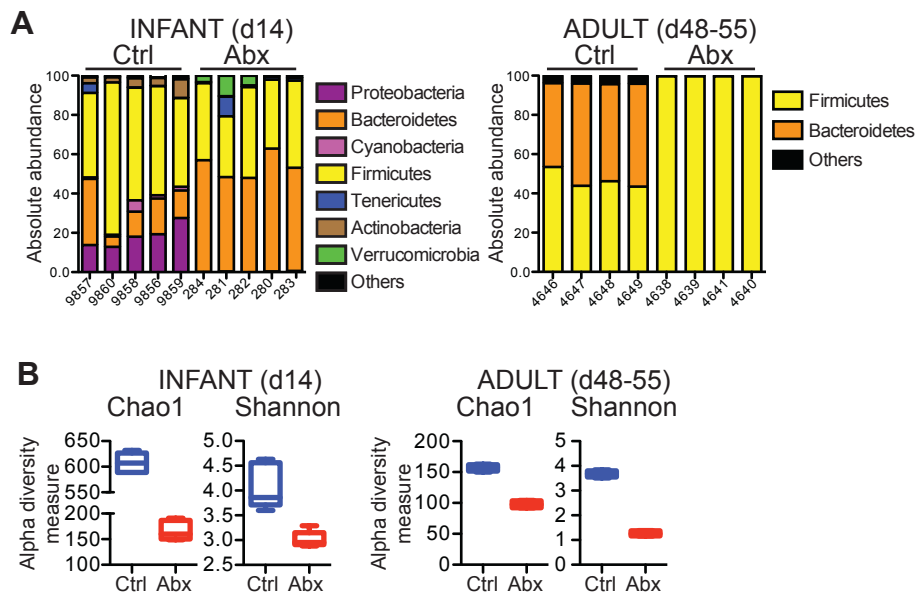

**Figure S12: Colonic microbial diversity of antibiotic treated infant and adult mice**

**A.** 16S sequencing of colonic content for bacterial diversity from infant (Ctrl n=5; Abx n=5) and adult mice that were treated with antibiotics in early life (Ctrl n=4; Abx n=4) was performed. Absolute abundance at phylum level is shown.

**B.** Chao1 and Shannon Index showing alpha diversity for complexity of microbiota within infant and adult groups.

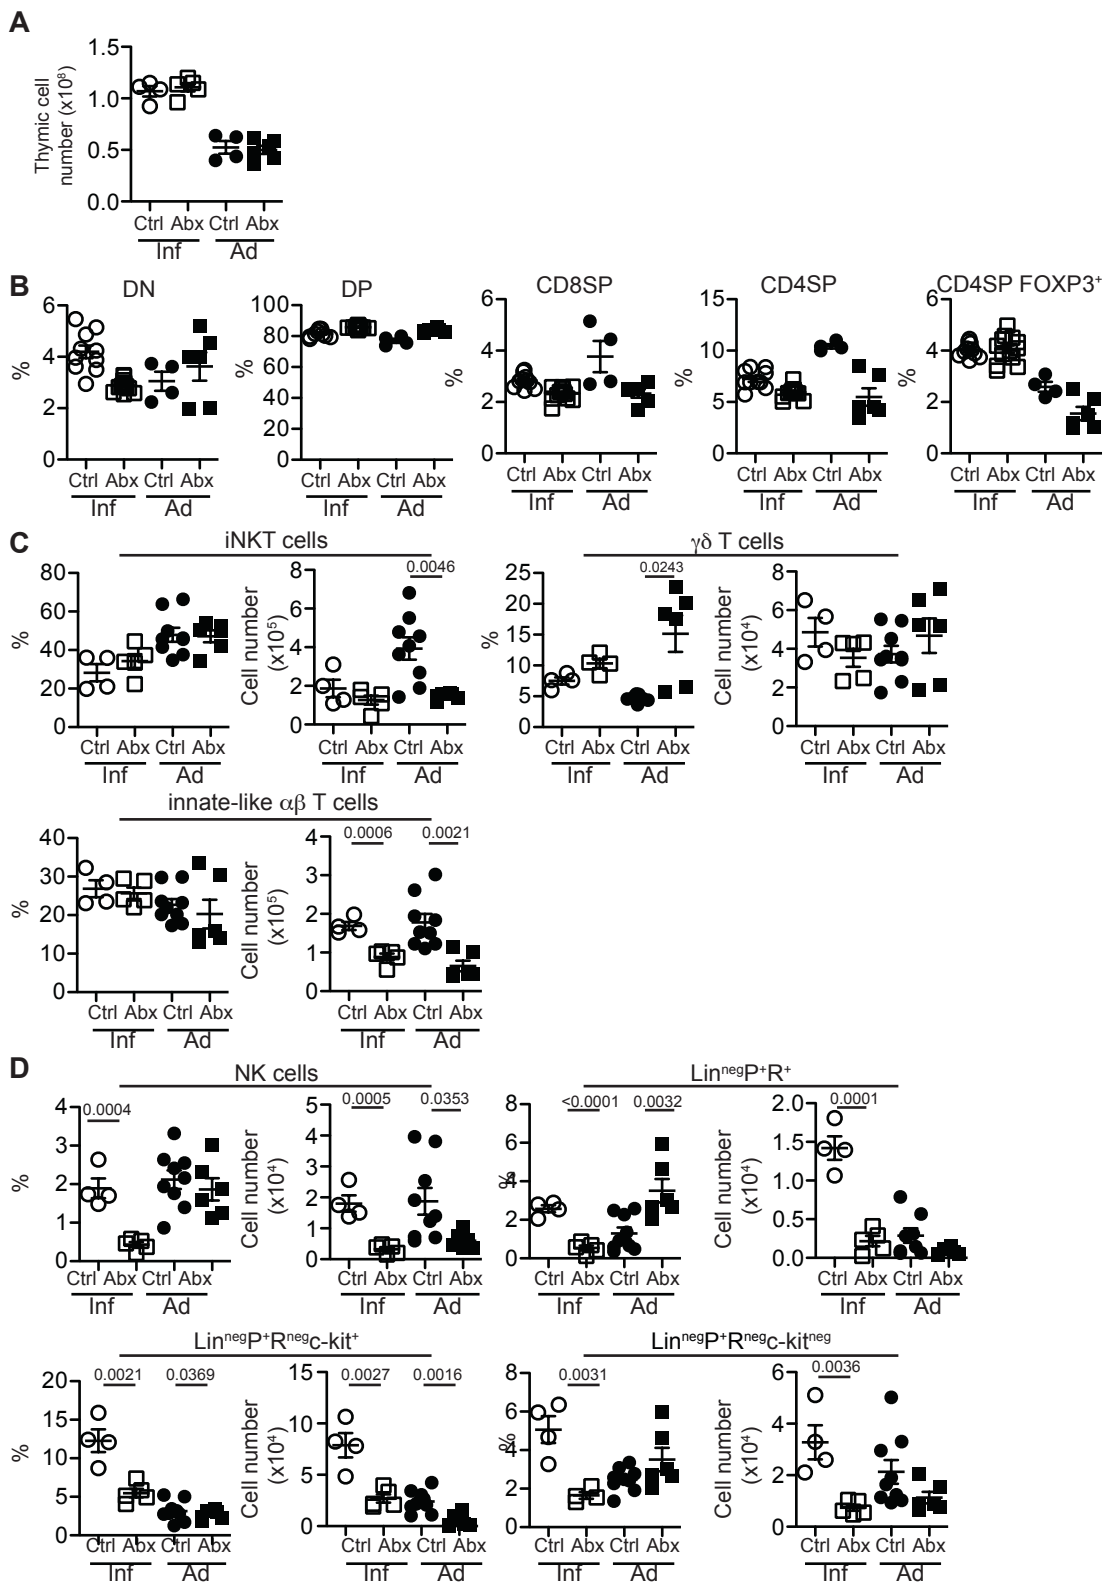

**Figure S13: Distribution of major T cell subsets and PLZF expressing cell subsets in thymus of antibiotics treated infant and adult mice.**

**A.** Total thymic cellularity (Inf-Ctrl n=4; Inf-Abx n=5; Ad-Ctrl n=4; Ad-Abx n=6).

**B.** Frequency of thymic DN, DP, CD8SP, CD4SP and CD4SP FOXP3<sup>+</sup> cells (Inf-Ctrl n=10; Inf-Abx n=13; Ad-Ctrl n=4; Ad-Abx n=6).

**C.** Frequency and numbers of PLZF<sup>+</sup> iNKT cells, PLZF<sup>+</sup>  $\gamma\delta$  T cells and PLZF<sup>+</sup> innate-like  $\alpha\beta$ -T cells (Inf-Ctrl n=4; Inf-Abx n=5; Ad-Ctrl n=9; Ad-Abx n=6).

**D.** Frequency and numbers of PLZF<sup>+</sup> NK cells,  $\text{Lin}^{\text{neg}}\text{PLZF}^+\text{ROR}\gamma\text{t}^+$  cells,  $\text{Lin}^{\text{neg}}\text{PLZF}^+\text{ROR}\gamma\text{t}^{\text{neg}}\text{-kit}^+$  cells and  $\text{Lin}^{\text{neg}}\text{PLZF}^+\text{ROR}\gamma\text{t}^{\text{neg}}\text{-kit}^{\text{neg}}$  cells in the thymus (Inf-Ctrl n=4; Inf-Abx n=5; Ad-Ctrl n=9; Ad-Abx n=6).

Data are from 2 independent experiments for each group. Bars are Mean  $\pm$  SEM.

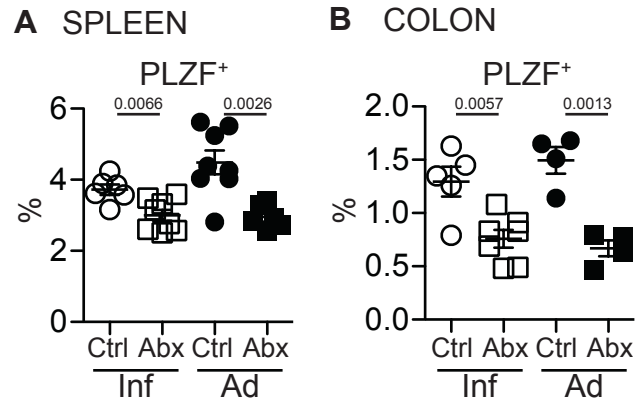

**Fig. S14: Frequency of PLZF<sup>+</sup> cells in the spleen and colon of antibiotic treated infant and adult mice.**

**A.** Frequency of PLZF<sup>+</sup> cells in spleen (Inf-Ctrl n=6; Inf-Abx n=8; Ad-Ctrl n=8; Ad-Abx n=6).

**B.** Frequency of PLZF<sup>+</sup> cells in colon (Inf-Ctrl n=5; Inf-Abx n=7; Ad-Ctrl n=4; Ad-Abx n=4).

Data are representative of 2 independent experiments. Bars are Mean  $\pm$  SEM.
